# Supplementary material
Source: PubMed Central journal article supplement (PMC5785266)
Supplement: jci-128-92812-s001.pdf [file jci-128-92812-s001.pdf]

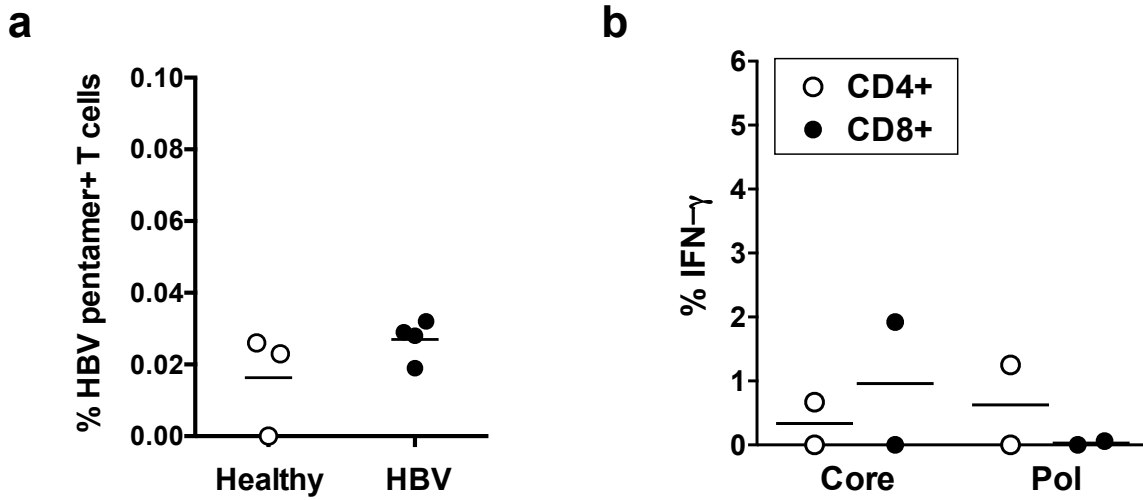

**Supplementary Figure S1**

**(a)** The percentage of pentamer+ CD8+ T cells specific for five HLA-A\*0201-restricted HBV epitopes (Core<sub>18-27</sub>, Env<sub>183-191</sub>, Env<sub>335-343</sub>, Pol<sub>455-463</sub> and Pol<sub>573-581</sub>) is shown for HLA-A\*02:01+ patients (n=4; NF 2, NF 7, NF 10 and F 5) and HLA-A\*02:01+ healthy donors (n=3). PBMCs were stained directly ex vivo and analysed by flow cytometry. **(b)** IFN- $\gamma$  release by CD4+ and CD8+ T cell lines generated after a 10 day in vitro expansion of PBMCs from patients of the flare group (n=2).

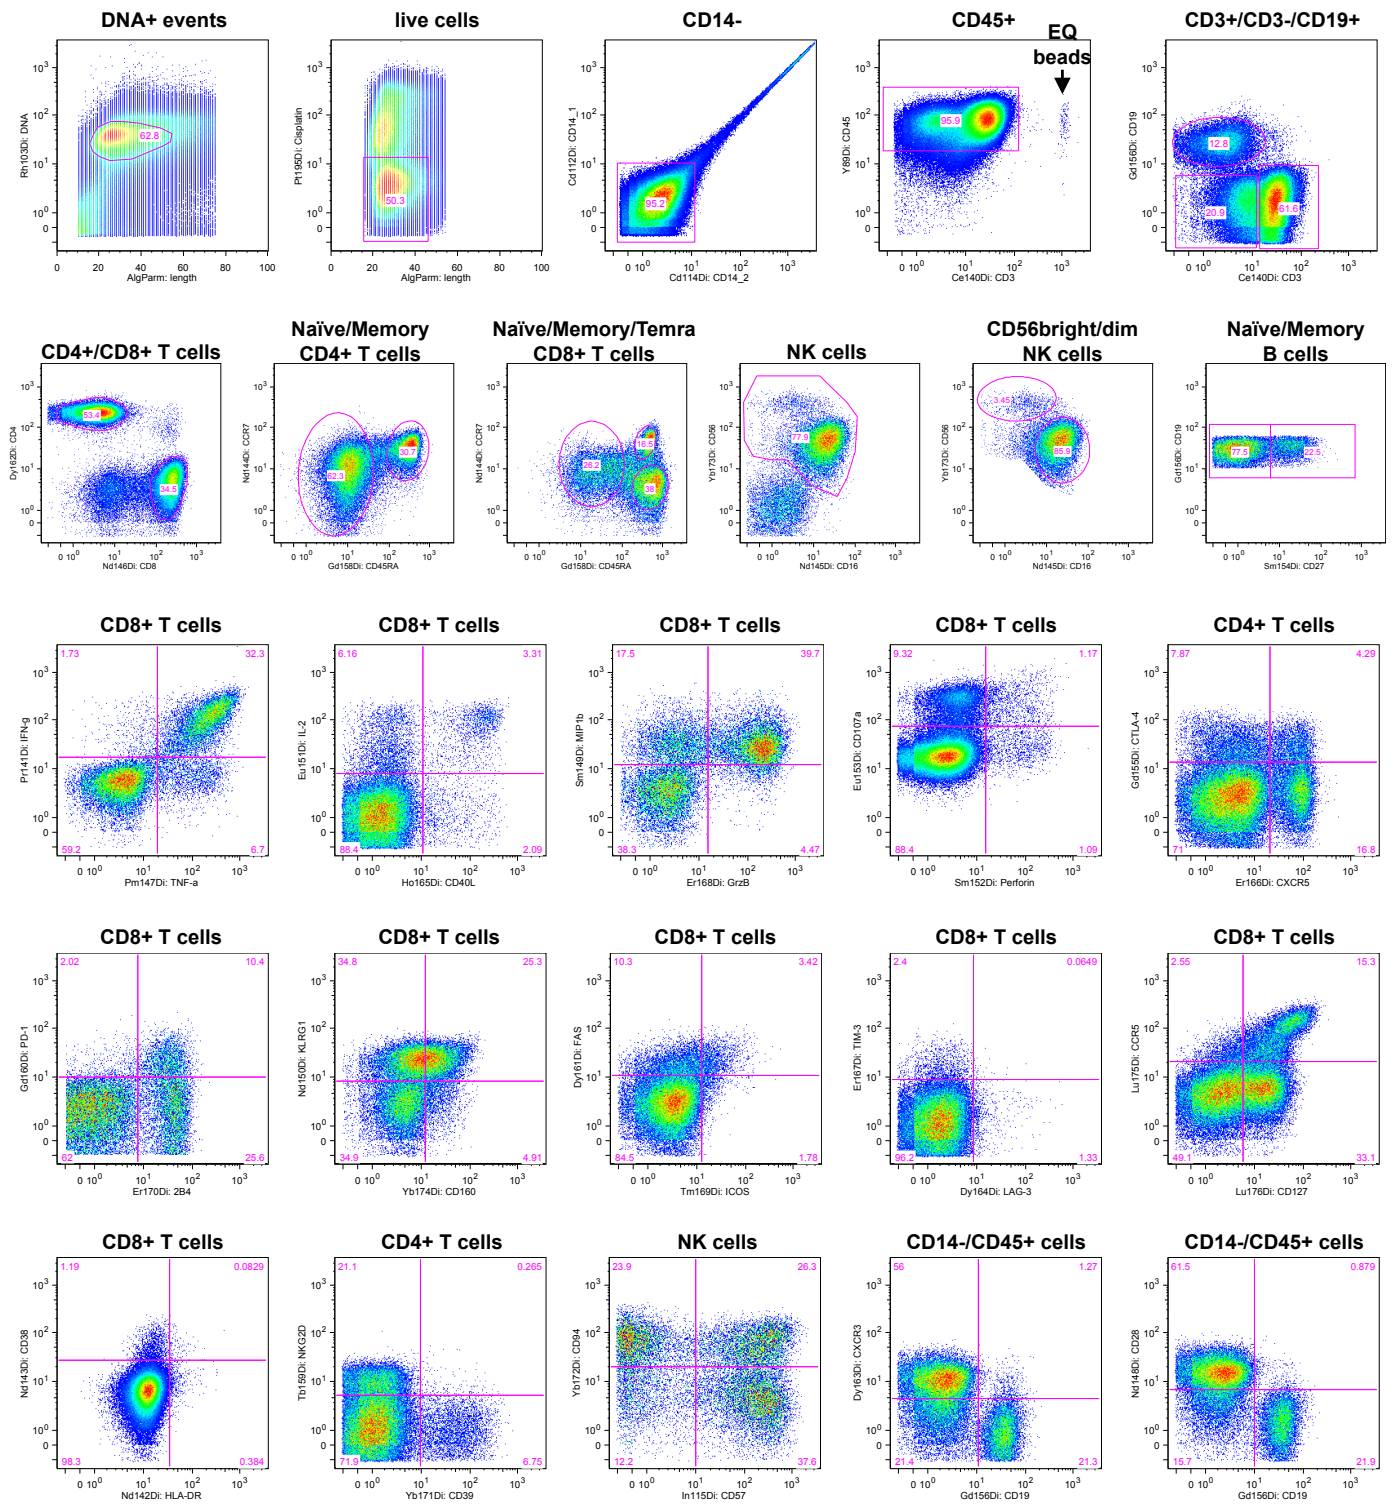

## Supplementary Figure S2

Simultaneous detection of lineage markers and molecules involved in cellular, differentiation, exhaustion and activation by CyTOF and gating strategy used to identify the populations of interest in Figure 4. Representative biaxial mass cytometry plots show the staining quality of all markers from the indicated immune cell type.

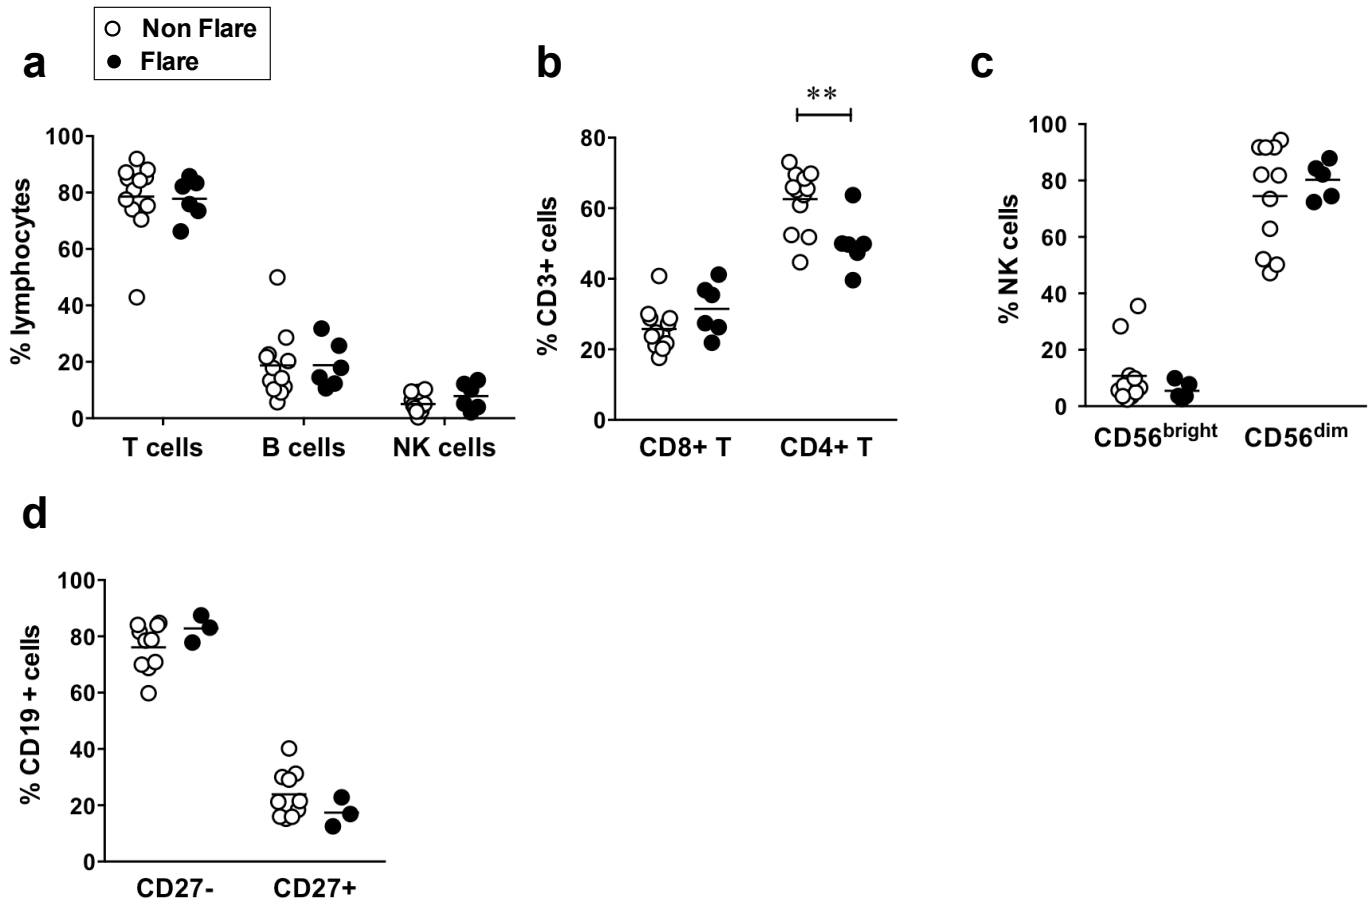

**Supplementary Figure S3**

Percentage of indicated immune cell subsets identified by CyTOF from patients that do or do not flare upon NUC therapy discontinuation.

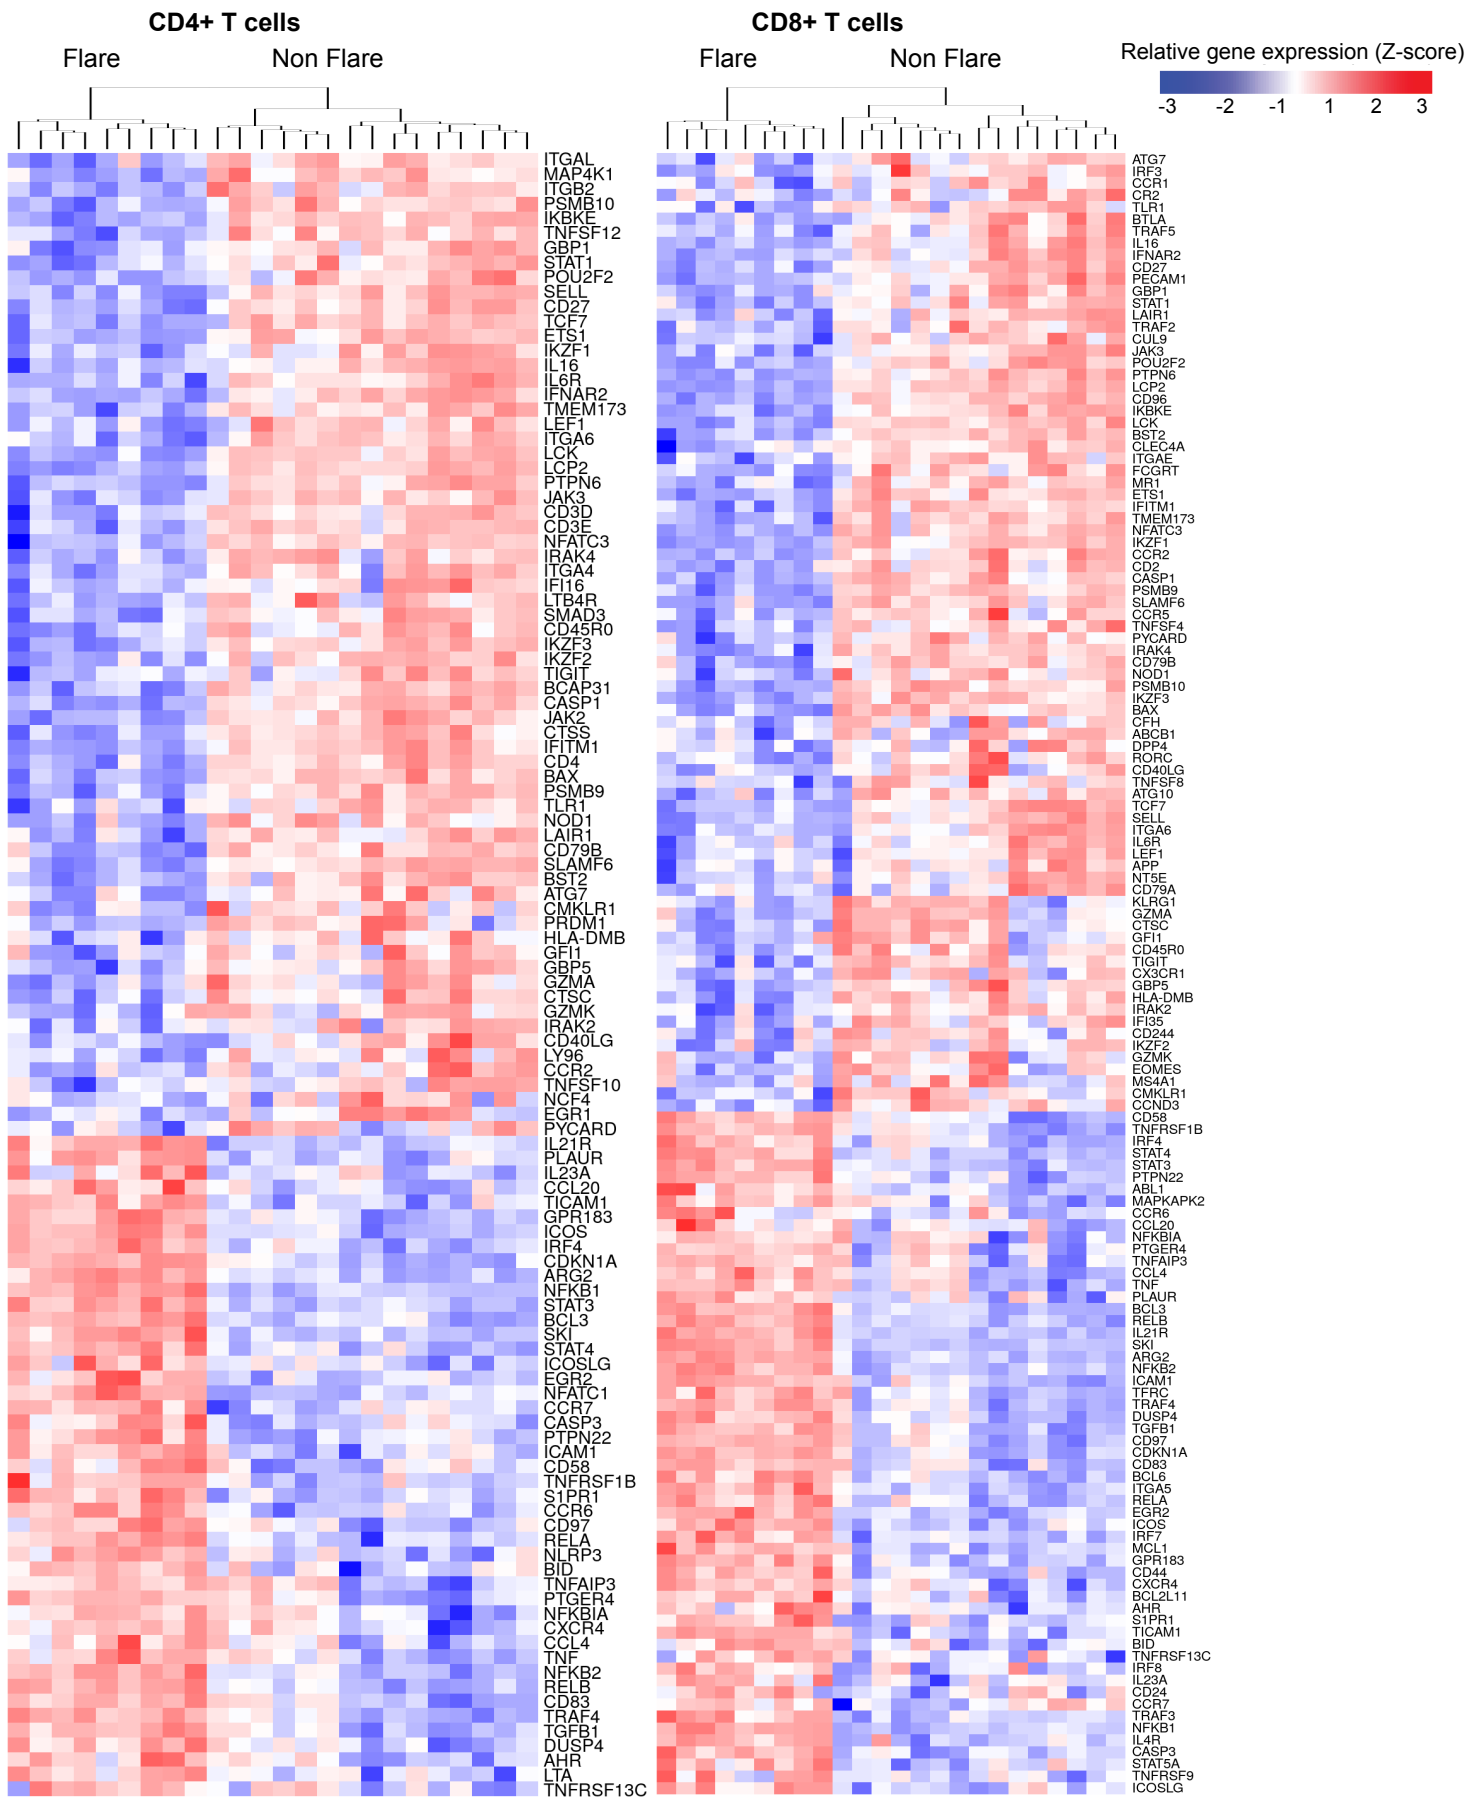

### Supplementary Figure S4

mRNA expression of immune-regulatory genes was analyzed by NanoString in CD4+ (left) and CD8+ (right) T cells sorted from the peripheral blood of patients that flare ( $n=9$ ) or do not flare ( $n=15$ ) upon therapy discontinuation. The differentially expressed genes ( $>1.5$  fold difference,  $p<0.05$ , FDR adjusted) in CD4+ and CD8+ T cells from the two patient groups are shown by heat map (log<sub>2</sub> transformed, z-score).

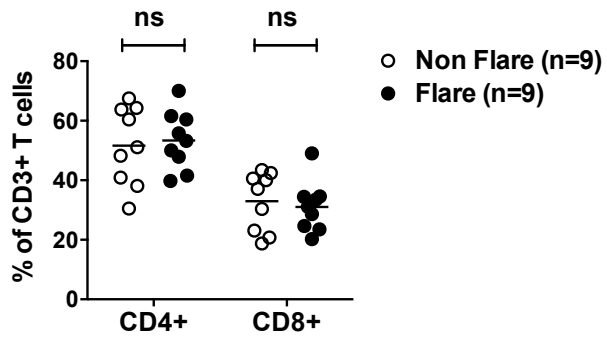

**Supplementary Figure S5**

Percentage of CD4+ and CD8+ T cells identified by flow cytometry in patients from cohort 2 that do or do not flare upon NUC therapy discontinuation.

**Supplementary Table S1**

| <b>Metal</b> | <b>Antibody</b> | <b>Clone</b> | <b>Company</b> |
|--------------|-----------------|--------------|----------------|
| 89Y          | CD45            | HI30         | Fluidigm       |
| 112/114Cd    | Qdot800-CD14    | TüK4         | Termo Fisher   |
| 115In        | CD57            | HCD57        | Biolegend      |
| 139La        | CD7             | M-T701       | BD Biosciences |
| 140Ce        | CD3             | UCHT1        | BioXcell       |
| 141Pr        | IFN- $\gamma$   | 4S.B3        | eBioscience    |
| 142Nd        | HLA-DR          | L243         | Biolegend      |
| 143Nd        | CD38            | HIT2         | Biolegend      |
| 144Nd        | CCR7            | 150503       | R&D            |
| 145Nd        | CD16            | 3G8          | Biolegend      |
| 146Nd        | CD8             | SK1          | Biolegend      |
| 147Sm        | TNF- $\alpha$   | MAB11        | eBioscience    |
| 148Nd        | CD28            | CD28.2       | Biolegend      |
| 149Sm        | MIP1- $\beta$   | D21-1351     | BD Biosciences |
| 150Nd        | KLRG1           | 13F2F12      | eBioscience    |
| 151Eu        | IL-2            | MQ1-17H12    | eBioscience    |
| 152Sm        | Perforin        | B-D48        | abcam          |
| 153Eu        | CD107a          | H4A3         | BD Biosciences |
| 154Sm        | CD27            | LG.7F9       | eBioscience    |
| 155Gd        | CTLA-4          | BN13         | BD Biosciences |
| 156Gd        | CD19            | HIB19        | Biolegend      |
| 158Gd        | CD45RA          | HI100        | Biolegend      |
| 159Tb        | NKG2D           | 1D11         | Biolegend      |
| 160Gd        | PD-1            | eBioJ105     | eBioscience    |
| 161Dy        | FAS (CD95)      | DX2          | Biolegend      |
| 162Dy        | CD4             | SK3          | Biolegend      |
| 163Dy        | CXCR3           | 1C6          | BD Biosciences |
| 164Dy        | LAG-3           | 874501       | R&D            |
| 165Ho        | CD40L (CD154)   | 24-31        | eBioscience    |
| 166Er        | CXCR5           | RF8B2        | BD Biosciences |
| 167Er        | TIM-3           | 344823       | R&D            |
| 168Er        | Granzyme B      | CLB-GB11     | abcam          |
| 169Tm        | ICOS            | C398.4A      | Biolegend      |
| 170Er        | 2B4             | C1.7         | Biolegend      |
| 171Yb        | CD39            | A1           | Biolegend      |
| 172Yb        | CD94            | DX22         | Biolegend      |
| 173Yb        | CD56            | NCAM16.2     | BD Biosciences |
| 174Yb        | CD160           | 688327       | R&D            |
| 175Lu        | CCR5            | HEK/1/85a    | Acris          |
| 176Yb        | CD127           | A019D5       | Biolegend      |

Intracellular antibodies
